# Supplementary material for: Achieving robust somatic mutation detection with deep learning models derived from reference data sets of a cancer sample
Source: PubMed Central journal article supplement (PMC8740374; doi:10.1186/s13059-021-02592-9), 2022-01-07
Supplement: 13059_2021_2592_MOESM2_ESM.pdf [file 13059_2021_2592_MOESM2_ESM.pdf]

Sahraeian et al. Achieving robust somatic mutation detection with deep learning models derived from reference data sets of a cancer sample

Supplementary Tables

Table S1 -Trained Network models used in this study

| Model                    | Training Dataset   | Somatic mutations                                                    | Region Trained | # of T/N replicates | Coverage of samples | Somatic mutations AF | # of somatic mutations in all replicates | # of total candidate variants used for training |
|--------------------------|--------------------|----------------------------------------------------------------------|----------------|---------------------|---------------------|----------------------|------------------------------------------|-------------------------------------------------|
| DREAM3                   | DREAM3 WGS         | <i>In silico</i> spikes                                              | 50% of genome  | 5                   | 30x                 | 5-50%                | 450K                                     | 29.2M                                           |
| WES-TCGA                 | TCGA               | <i>In silico</i> spikes                                              | exome          | 12                  | 45x-185x            | 0.5-100%             | 1.5M                                     | 5.9M                                            |
| SEQC-WGS-Spike           | SEQC2 WGS          | <i>In silico</i> spikes                                              | genome         | 20                  | 40x-170x            | 0.3-90%              | 2M                                       | 272M                                            |
| SEQC-WGS-GT-50           | SEQC2 WGS          | Real GT mutations in SEQC2                                           | 50% of genome  | 24                  | 40x-390x            | 0.5-100%             | 416K                                     | 137M                                            |
| SEQC-WGS-GTS0-SpikeWGS10 | SEQC2 WGS          | Real GT mutations in SEQC2 + <i>in silico</i> spikes from 10% of WGS | genome         | 44                  | 40x-390x            | 0.3-100%             | 574K                                     | 164M                                            |
| SEQC-WES-Spike           | SEQC2 WES          | <i>In silico</i> spikes                                              | exome          | 7                   | 60x-550x            | 0.1-100%             | 755K                                     | 3.7M                                            |
| SEQC-FFPE-Spike          | SEQC2 WGS-FFPE     | <i>In silico</i> spikes                                              | genome         | 16                  | 54x-77x             | 0.5-83%              | 1.7M                                     | 191M                                            |
| SEQC-FFPE-WES-Spike      | SEQC2 WES-FFPE     | <i>In silico</i> spikes                                              | exome          | 14                  | 70x-90x             | 0.1-88%              | 1.4M                                     | 9.6M                                            |
| SEQC-WES-SpikeWGS10      | SEQC2 WES/WGS      | <i>In silico</i> spikes                                              | exome          | 27                  | 40x-550x            | 0.1-100%             | 963K                                     | 30.9M                                           |
| SEQC-FFPE-SpikeWGS10     | SEQC2 WGS-FFPE/WGS | <i>In silico</i> spikes                                              | genome         | 36                  | 40x-170x            | 0.3-90%              | 1.9M                                     | 218M                                            |
| SEQC-FFPE-WES-SpikeWGS10 | SEQC2 WES-FFPE/WGS | <i>In silico</i> spikes                                              | exome          | 47                  | 40x-170x            | 0.1-90%              | 1.6M                                     | 36.8M                                           |









Table S9 - F1-score (%) performance for the SEQC-WGS-Spike model and two sample-specific network trained models

| Sample                      |                |        |               |                |        |               |
|-----------------------------|----------------|--------|---------------|----------------|--------|---------------|
|                             | NeuSomatic-S   |        |               | NeuSomatic     |        |               |
|                             | SEQC-WGS-Spike | Sample | Sample+10%WGS | SEQC-WGS-Spike | Sample | Sample+10%WGS |
| <b>SNVs</b>                 |                |        |               |                |        |               |
| WGS-NovaSeq                 | 89.9           | 91.4   | 90.7          | 94.2           | 94.7   | 94.4          |
| Titration-50%T-30X          | 77.1           | 74.9   | 75.4          | 83.1           | 82.7   | 82.0          |
| Titration-10%T-100X         | 45.2           | 46.0   | 46.1          | 63.8           | 64.4   | 62.3          |
| Library-prep-1ng-Nextera    | 88.5           | 86.3   | 86.9          | 90.3           | 91.9   | 91.4          |
| WGS-FFPE-24h (FFPE-normal)  | 82.9           | 83.7   | 81.2          | 84.8           | 86.0   | 85.8          |
| WGS-FFPE-24h (Fresh-normal) | 81.8           | 80.1   | 80.8          | 84.1           | 85.9   | 86.2          |
| WES                         | 97.1           | 82.7   | 97.6          | 97.1           | 96.4   | 97.5          |
| WES-FFPE-24h (FFPE-normal)  | 86.2           | 53.3   | 84.9          | 83.2           | 82.7   | 87.0          |
| WES-FFPE-24h (Fresh-normal) | 86.8           | 54.9   | 82.3          | 86.9           | 86.3   | 86.6          |
| Average                     | 81.7           | 72.6   | 80.7          | 85.3           | 85.7   | 85.9          |
| <b>INDELS</b>               |                |        |               |                |        |               |
| WGS-NovaSeq                 | 75.8           | 78.5   | 77.3          | 82.0           | 81.8   | 85.3          |
| Titration-50%T-30X          | 66.5           | 65.0   | 68.0          | 74.4           | 74.2   | 67.6          |
| Titration-10%T-100X         | 46.2           | 43.1   | 45.6          | 56.9           | 54.2   | 56.3          |
| Library-prep-1ng-Nextera    | 59.8           | 67.3   | 67.1          | 60.2           | 79.6   | 78.1          |
| WGS-FFPE-24h (FFPE-normal)  | 68.6           | 66.1   | 66.9          | 74.3           | 78.4   | 77.6          |
| WGS-FFPE-24h (Fresh-normal) | 64.2           | 65.7   | 64.3          | 63.8           | 78.8   | 78.6          |
| Average                     | 63.5           | 64.3   | 64.9          | 68.6           | 74.5   | 73.9          |

Table S10 - Computational complexity comparison of different somatic mutation detection algorithms. CPU time (hours) and maximum memory (GB) are shown for NA12878.BRCA sample with 220x tumor coverage and 75x normal coverage

| <b>Tool</b>   | <b>CPU time (hours)</b> | <b>Maximum Memory (GB)</b> |
|---------------|-------------------------|----------------------------|
| NeuSomatic    | 785                     | 44                         |
| NeuSomatic-S  | 153                     | 44                         |
| Strelka2      | 55                      | 1                          |
| Lancet        | 5014                    | 85                         |
| MuTect2       | 168                     | 5                          |
| Octopus-hard  | 7150                    | 24                         |
| Octopus-RF    | 7500                    | 24                         |
| MuSE          | 170                     | 0                          |
| SomaticSniper | 16                      | 7                          |
| VarDict       | 161                     | 3                          |

\* DRAGEN spent 1.4h on FPGA to finish for this sample. Since DRAGEN ran on FPGA and does not use memory the same way as a CPU the CPU time and maximum memory usage are not comparable with other techniques.
